# Supplementary material for: gRNA validation for wheat genome editing with the CRISPR-Cas9 system
Source: PubMed Central journal article supplement (PMC6829922; doi:10.1186/s12896-019-0565-z), 2019-10-30

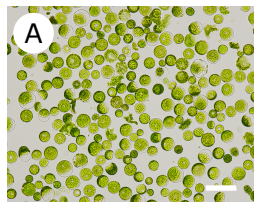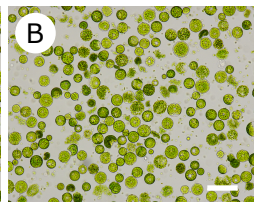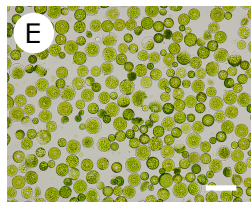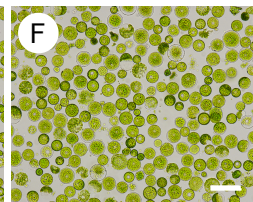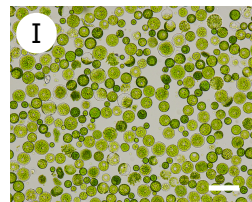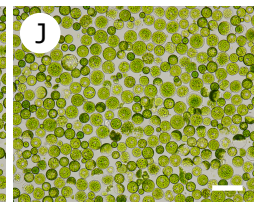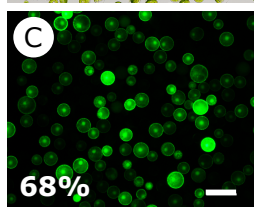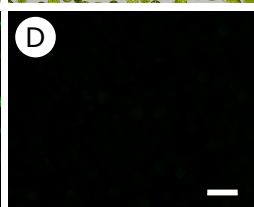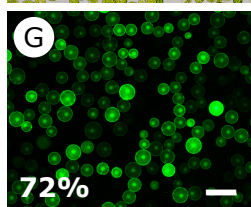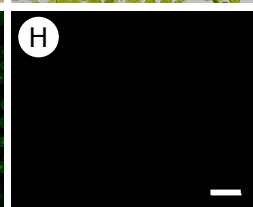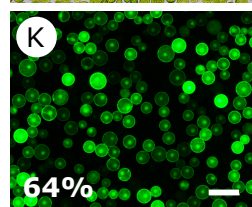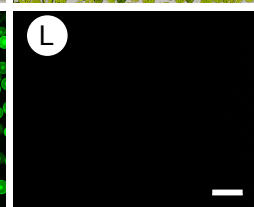

Supplement: 12896_2019_565_MOESM1_ESM.pdf [file 12896_2019_565_MOESM1_ESM.pdf]
