# Supplementary material for: gRNA validation for wheat genome editing with the CRISPR-Cas9 system
Source: PubMed Central journal article supplement (PMC6829922; doi:10.1186/s12896-019-0565-z), 2019-10-30
Supplement: 12896_2019_565_MOESM12_ESM.pdf [file 12896_2019_565_MOESM12_ESM.pdf]

# gRNA2

## 7AS

## 4AL

## 7DS

### Rep 1

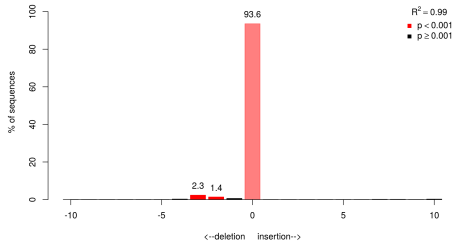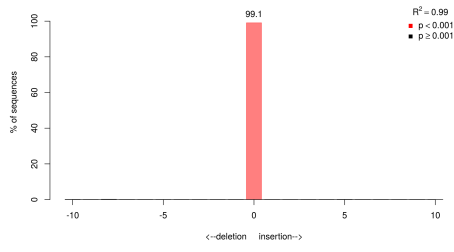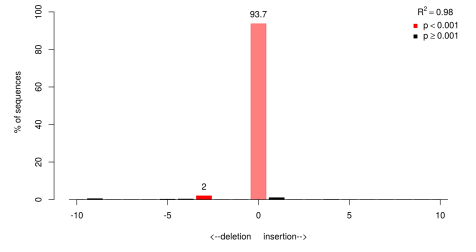

### Forward

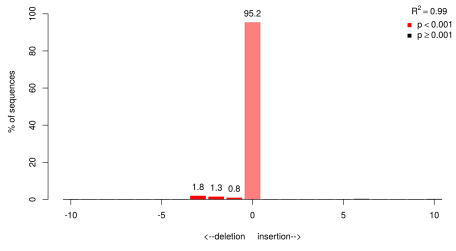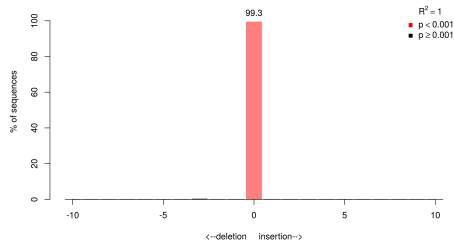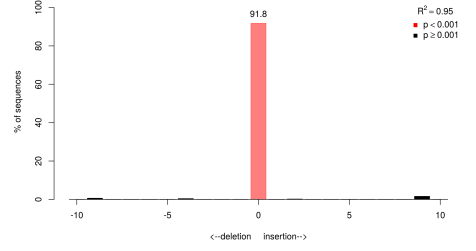

### Reverse

### Rep 2

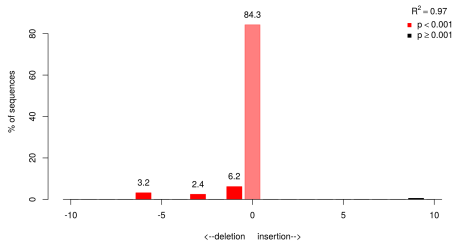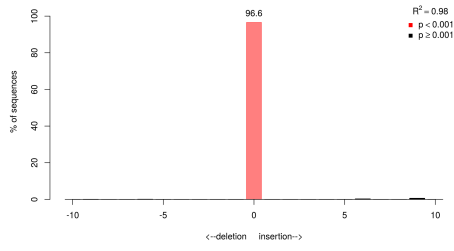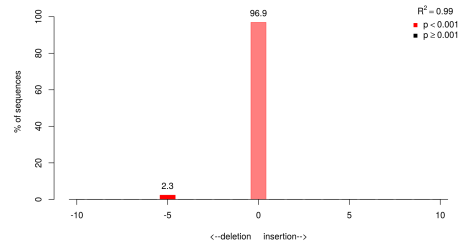

### Forward

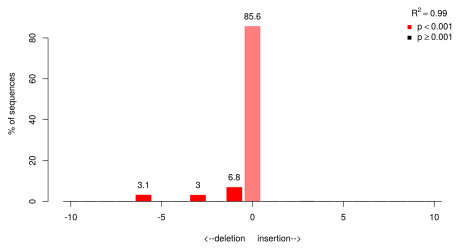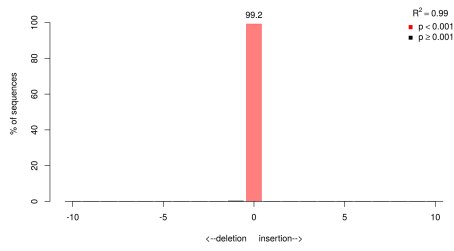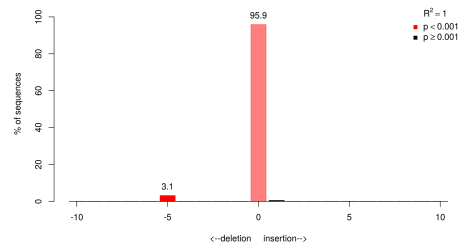

### Reverse

### Rep 3

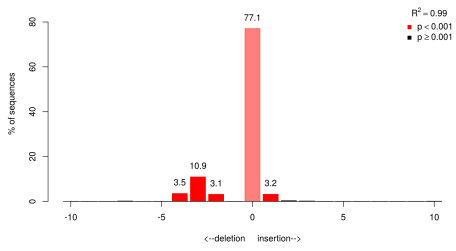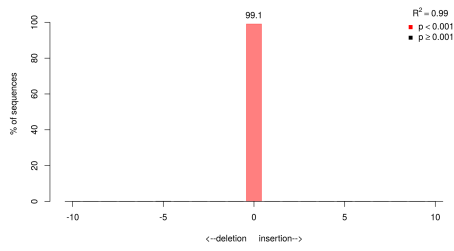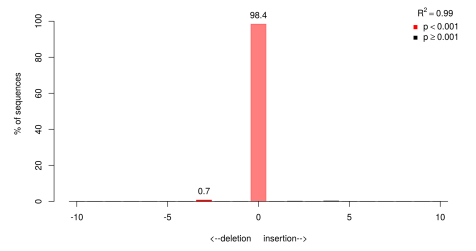

### Forward

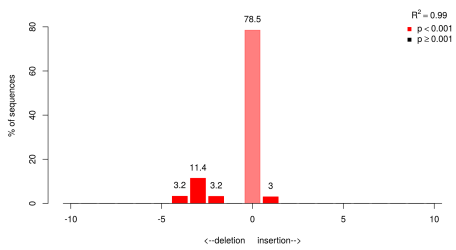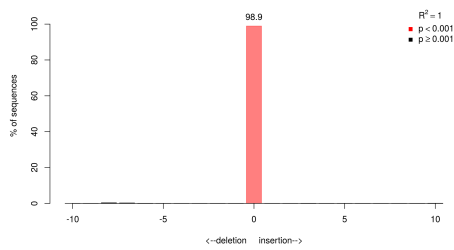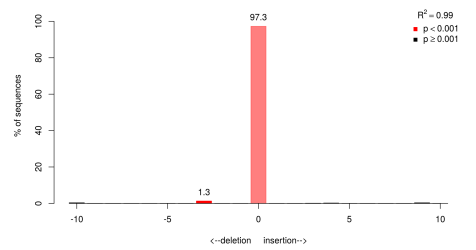

### Reverse

# gRNA3

## 7AS

## 4AL

## 7DS

### Rep 1

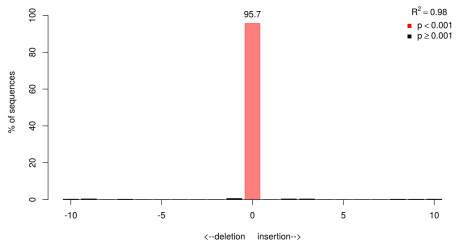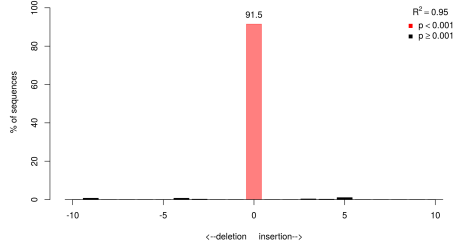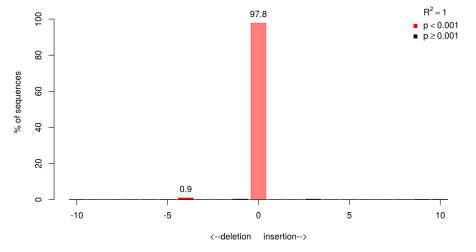

### Forward

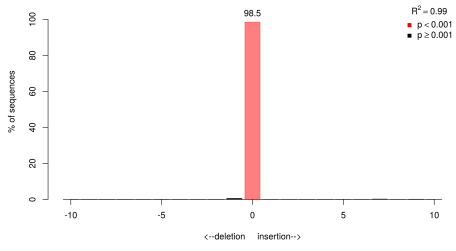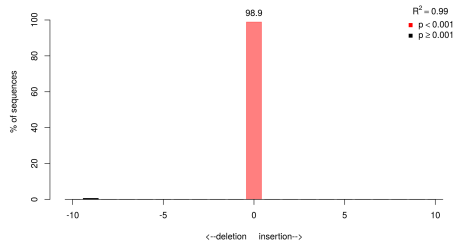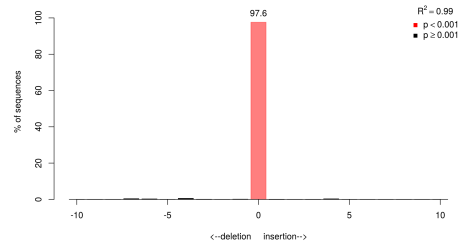

### Reverse

### Rep 2

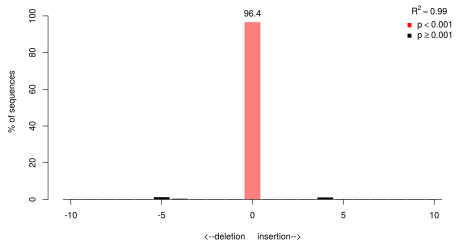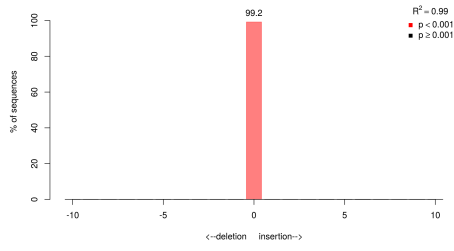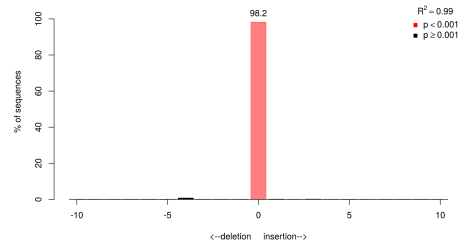

### Forward

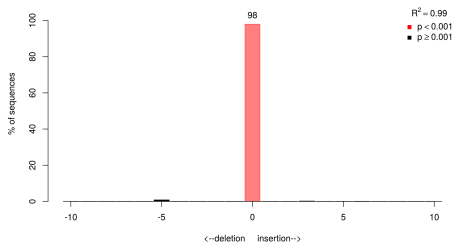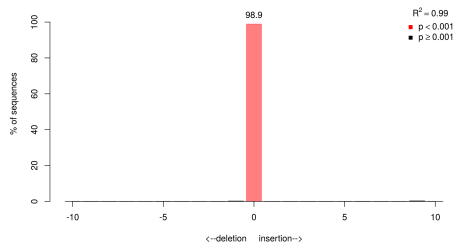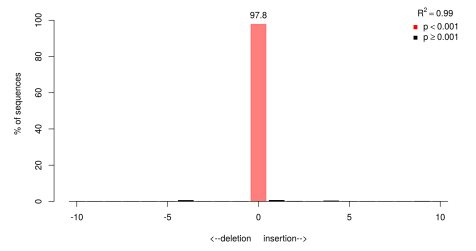

### Reverse

### Rep 3

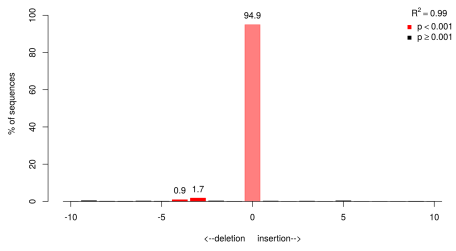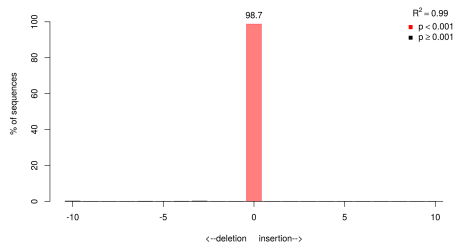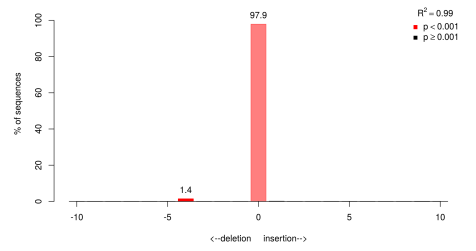

### Forward

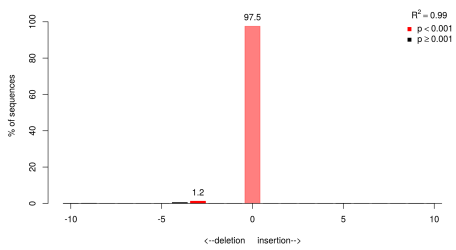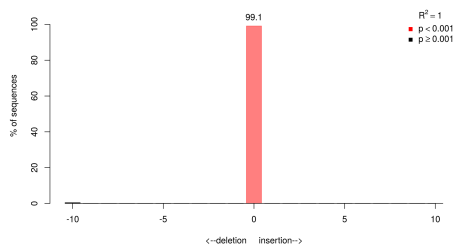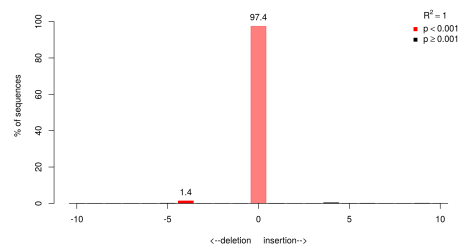

### Reverse





# gRNA5

## 7AS

## 4AL

## 7DS

### Rep 1

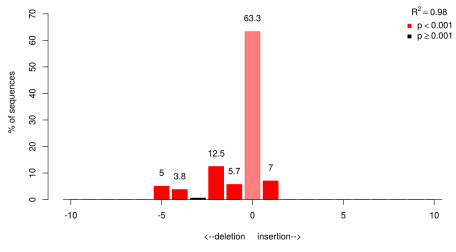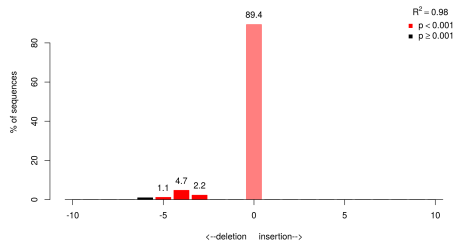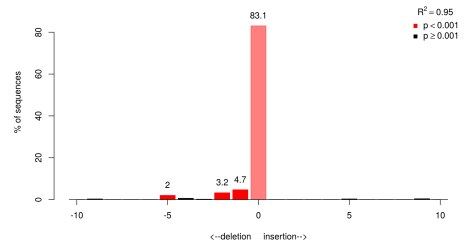

### Forward

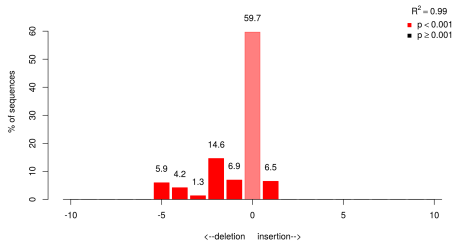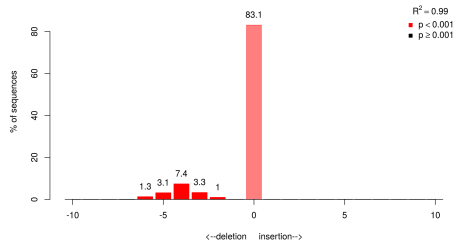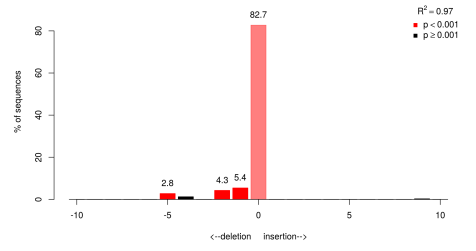

### Reverse

### Rep 2

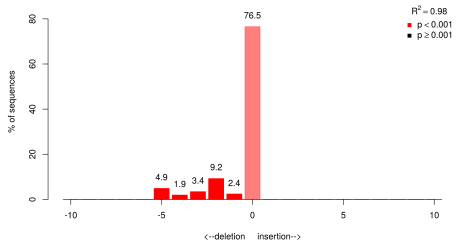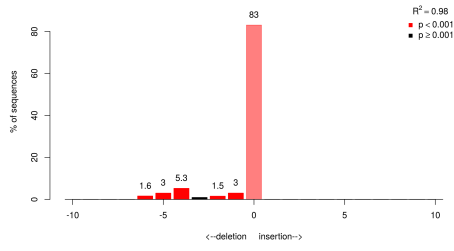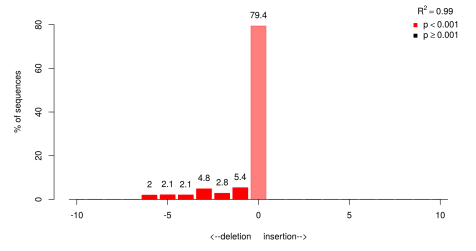

### Forward

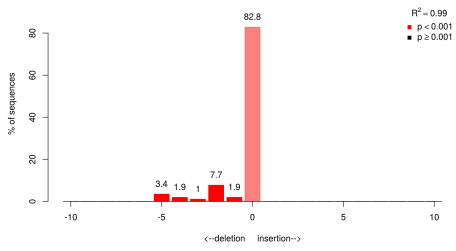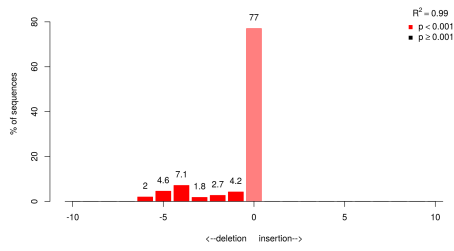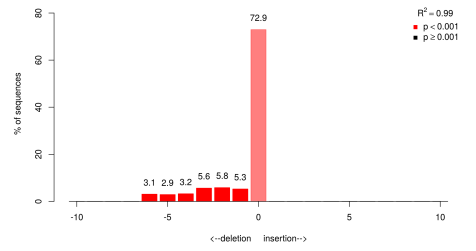

### Reverse

### Rep 3

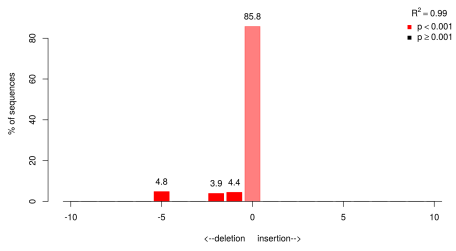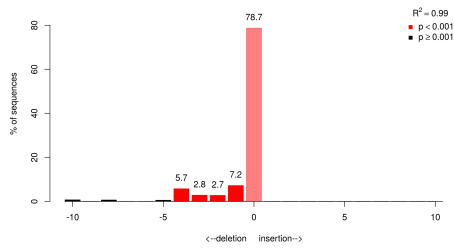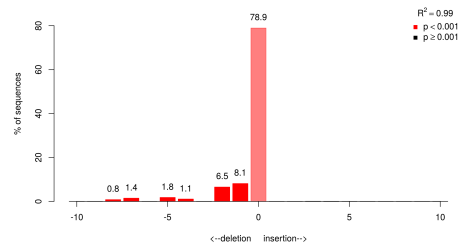

### Forward

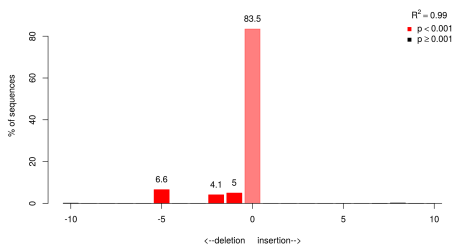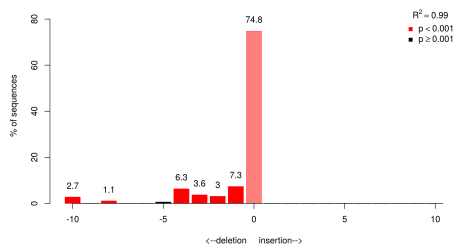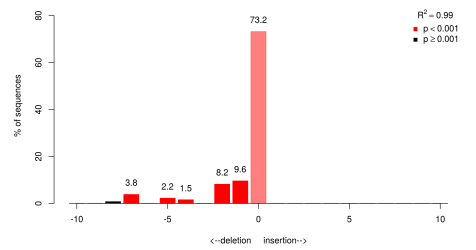

### Reverse

# gRNA6

## 7AS

## 4AL

## 7DS

### Rep 1

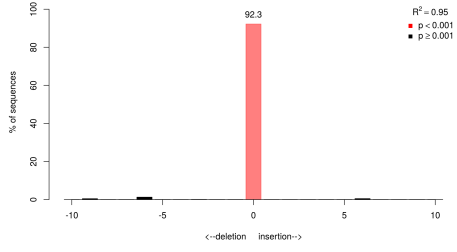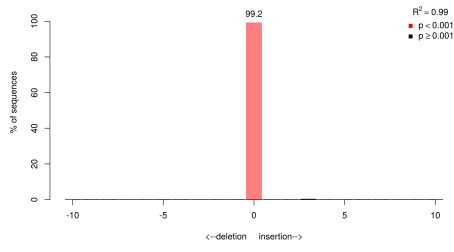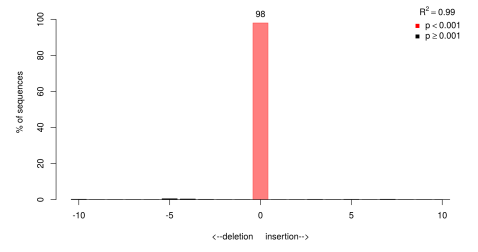

### Forward

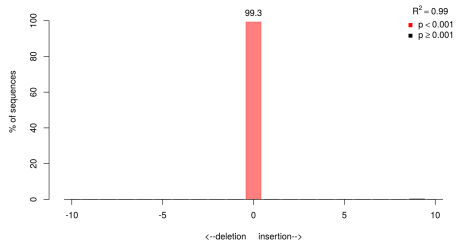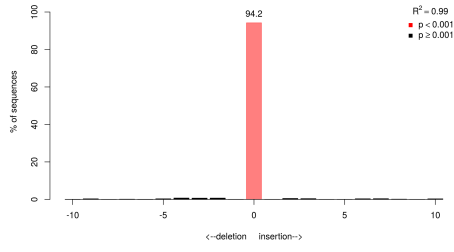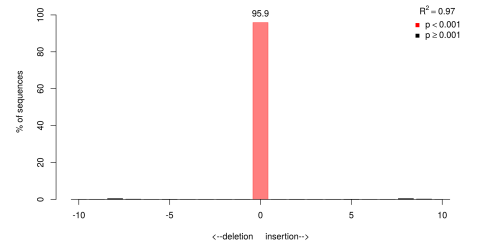

### Reverse

### Rep 2

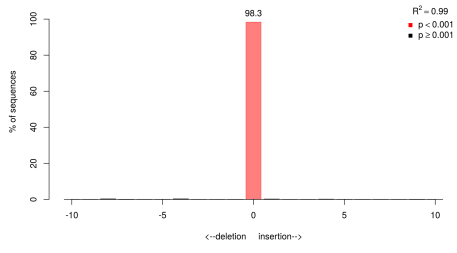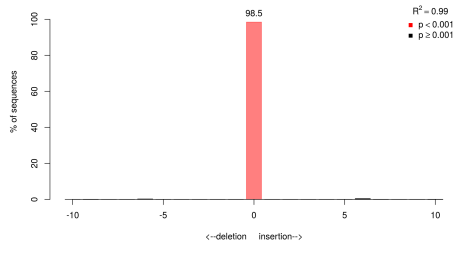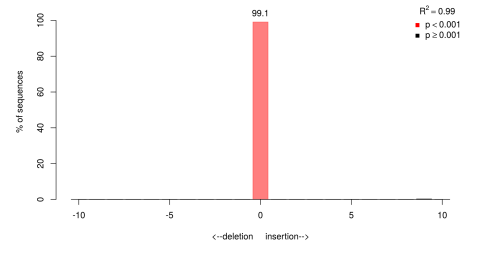

### Forward

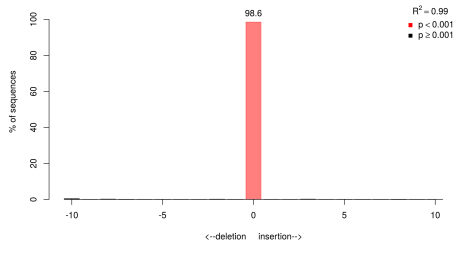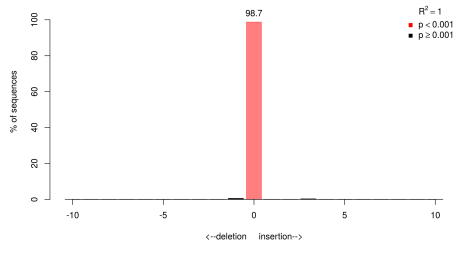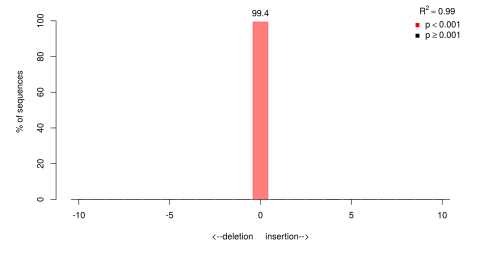

### Reverse

### Rep 3

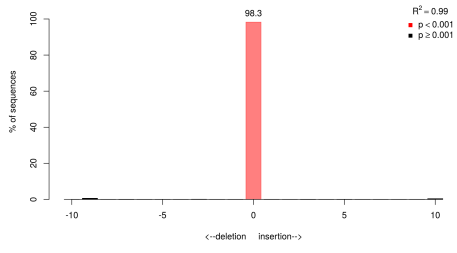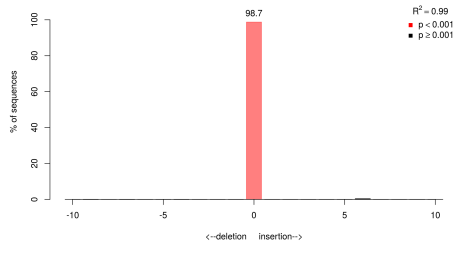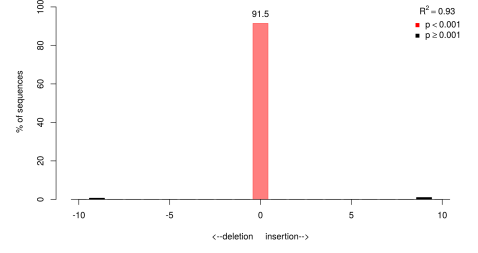

### Forward

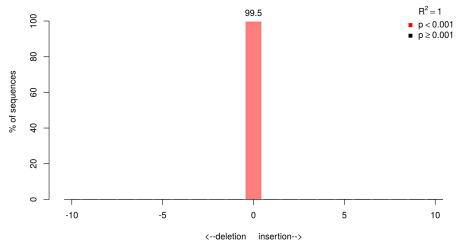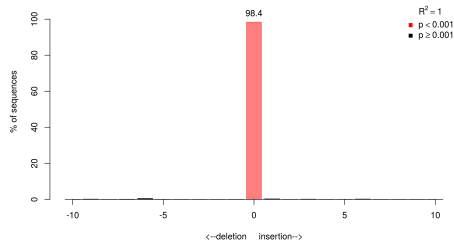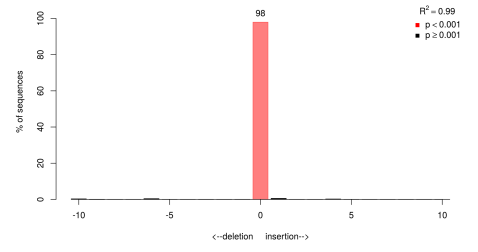

### Reverse

# gRNA7

## 7AS

## 4AL

## 7DS

### Rep 1

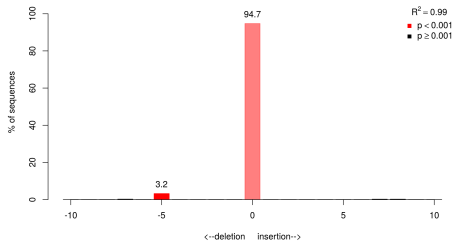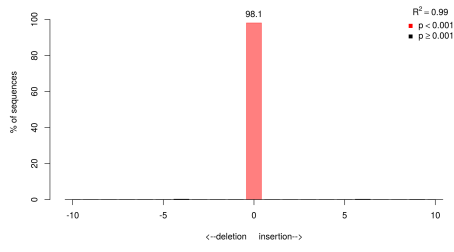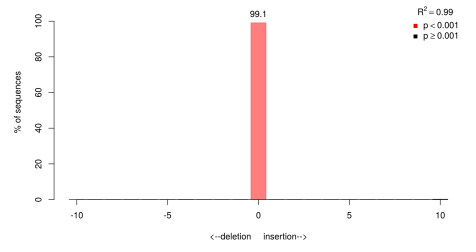

### Forward

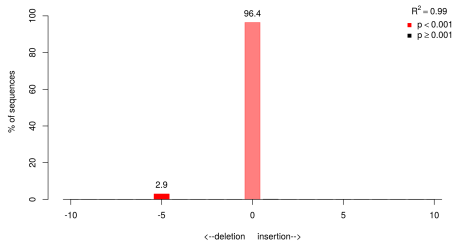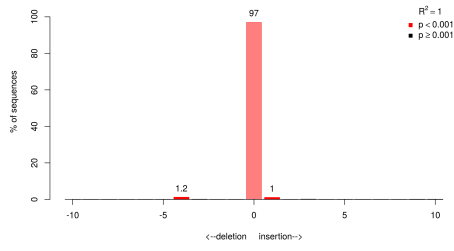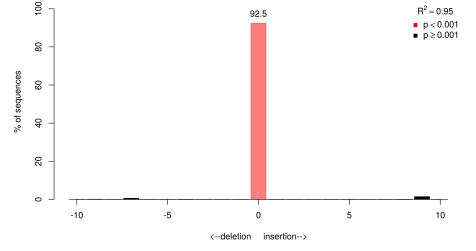

### Reverse

### Rep 2

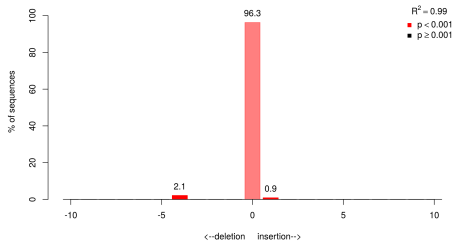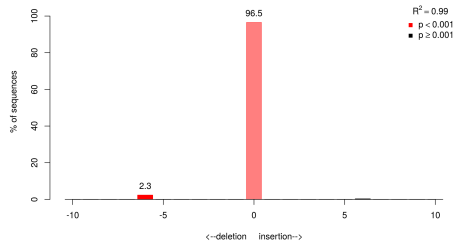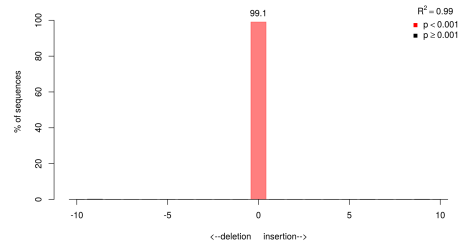

### Forward

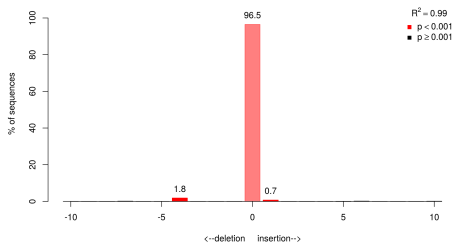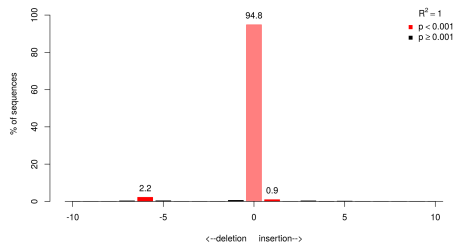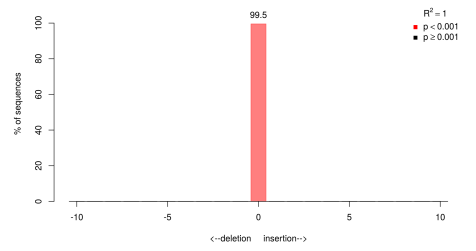

### Reverse

### Rep 3

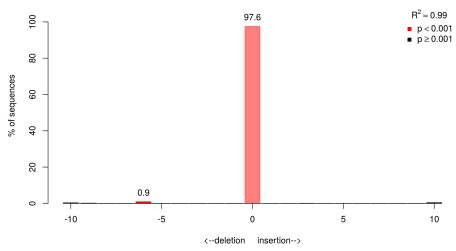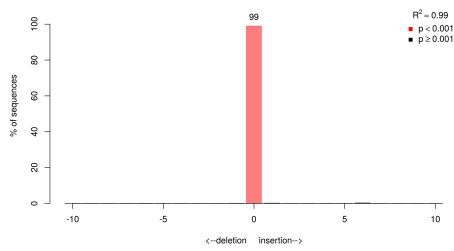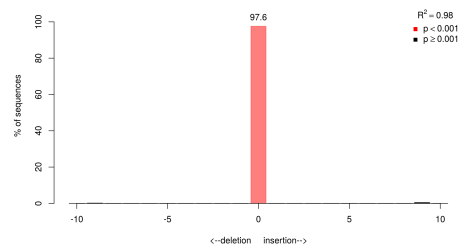

### Forward

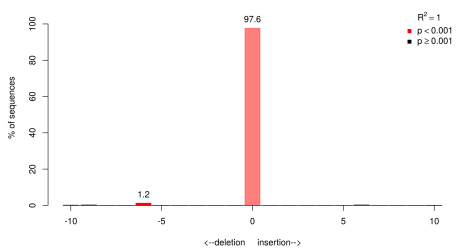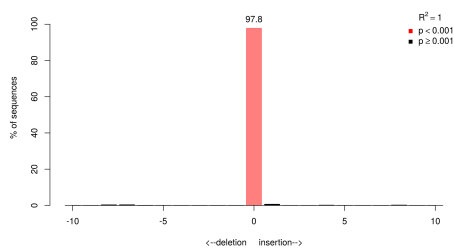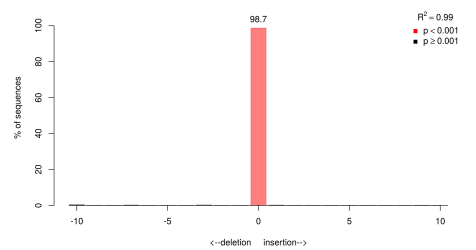

### Reverse
