# Supplementary material for: gRNA validation for wheat genome editing with the CRISPR-Cas9 system
Source: PubMed Central journal article supplement (PMC6829922; doi:10.1186/s12896-019-0565-z), 2019-10-30
Supplement: 12896_2019_565_MOESM16_ESM.pdf [file 12896_2019_565_MOESM16_ESM.pdf]

## Additional file 16. Primers and oligonucleotides used in this study

| Oligo name        | Sequence 5'-3' (non-binding in red)                         | Use                                                                  |
|-------------------|-------------------------------------------------------------|----------------------------------------------------------------------|
| TaEPSPS_Ex1_3'_F2 | GCTCCAAGTCGCTCTCCAAC                                        | Cloning of EPSPS on 7AS/4AL                                          |
| TaEPSPS_Ex5_R2    | TTCGACAGTCACAGTCCCTCC                                       | Cloning of EPSPS on 7AS/4AL and Sanger seq of pCR8-TaEPSPS-FL clones |
| TaEPSPS_D_Int6_R  | CGCACGTGCTAGATTGC                                           | Cloning of EPSPS on 7DS                                              |
| TaEPSPS_Ex2_F     | CTGTGGTTGTTGGCTGTGG                                         | Sanger seq of pCR8-TaEPSPS-FL clones                                 |
| TaEPSPS_Ex3_R2    | CGCTCCCTCATCTTGGTAC                                         | Sanger seq of pCR8-TaEPSPS-FL clones                                 |
| TaEPSPS-gRNA1_F   | CTTGAAC T GCAATGCGGCCACTGA                                  | Sense oligo for gRNA1                                                |
| TaEPSPS-gRNA1_R   | AAACTCAGTGGCCGCATTGCAGTT                                    | Antisense oligo for gRNA1                                            |
| TaEPSPS-gRNA2_F   | CTTGCTACTACAGCTGCCGTCAG                                     | Sense oligo for gRNA2                                                |
| TaEPSPS-gRNA2_R   | AAACTGACGGCAGCTGTAGTAG                                      | Antisense oligo for gRNA2                                            |
| TaEPSPS-gRNA3_F   | CTTGATCAGTCTCCAAACATACCCA                                   | Sense oligo for gRNA3                                                |
| TaEPSPS-gRNA3_R   | AAACTGGGTATGTTTGGAGACTGAT                                   | Antisense oligo for gRNA3                                            |
| TaEPSPS-gRNA4_F   | CTTGAAATAAGTATGAGATCCAT                                     | Sense oligo for gRNA4                                                |
| TaEPSPS-gRNA4_R   | AAACATGGATCTCATACTTATTT                                     | Antisense oligo for gRNA4                                            |
| TaEPSPS-gRNA5_F   | CTTG GTCGAAAAGGACGCCAAAG                                    | Sense oligo for gRNA5                                                |
| TaEPSPS-gRNA5_R   | AAACTTTGGCGTCCTTTTCGAC                                      | Antisense oligo for gRNA5                                            |
| TaEPSPS-gRNA6_F   | CTTGAAGCTCTTCTGGGTAATGC                                     | Sense oligo for gRNA6                                                |
| TaEPSPS-gRNA6_R   | AAACGCATTACCCAAGAAGAGCTT                                    | Antisense oligo for gRNA6                                            |
| TaEPSPS-gRNA7_F   | CTTGTAATGCTGGAAGTCAATG                                      | Sense oligo for gRNA7                                                |
| TaEPSPS-gRNA7_R   | AAACCATTGCAGTTCAGCATTAA                                     | Antisense oligo for gRNA7                                            |
| TaEPSPS_A_Int1_F  | AGCTTGTATTTGGATCAAGATATC                                    | Amplification of EPSPS on 7AS                                        |
| TaEPSPS_A_Int4_R  | TCAGTAAAAGCGTAGATGTGAC                                      | Amplification of EPSPS on 7AS                                        |
| TaEPSPS_B_Int1_F  | TTCTGATGGACCCTTTATGAG                                       | Amplification of EPSPS on 4AL                                        |
| TaEPSPS_B_Int4_R  | CAAACAAC T GCCGATGTT                                        | Amplification of EPSPS on 4AL                                        |
| TaEPSPS_D_Int1_F  | CATTGGATTGTGTAGCTTGTAC                                      | Amplification/cloning of EPSPS on 7DS                                |
| TaEPSPS_D_Int4_R  | GCCAAACAAC T GCCGATATC                                      | Amplification of EPSPS on 7DS                                        |
| TaEPSPS_A_Int1_F2 | GATCCGTAGCTTGTCTTCTGG                                       | Sanger seq of amplicons from 7AS                                     |
| TaEPSPS_A_Int3_R  | ACAGAAGTGTGCACAAAGTAG                                       | Sanger seq of amplicons from 7AS                                     |
| TaEPSPS_B_Int1_F2 | TCACTGTCATATCTAGCTGATCT                                     | Sanger seq of amplicons from 4AL                                     |
| TaEPSPS_B_Int3_R  | GTACATAACATGCAATTTTCAG                                      | Sanger seq of amplicons from 4AL                                     |
| TaEPSPS_D_Int1_F2 | TAGCTGATCCGTAGCTTGTGTC                                      | Sanger seq of amplicons from 7DS                                     |
| TaEPSPS_D_Int3_R  | GTACATAACATGCAAGTTCACA                                      | Sanger seq of amplicons from 7DS                                     |
| TaEPSPS_NGS_F_P5  | TCGTGGCAGCGTCAGATGTGTATAAG<br>AGACAGGTGGAAGCAGATAAAGTTGC    | First round of amplification for deep seq                            |
| TaEPSPS_NGS_R_P7  | GTCTCGTGGGCTCGGAGATGTGTATAAG<br>AGACAGCCATCAAGCACATAACTGAAG | First round of amplification for deep seq                            |
